# Supplementary material for: High dose dietary vitamin D3 increases bone mass and strength in mice
Source: PubMed Central journal article supplement — Bone Rep. 2017 Feb 10;6:44–50. doi: 10.1016/j.bonr.2017.02.001 (PMC5365305; doi:10.1016/j.bonr.2017.02.001), 2017-02-10
Supplement: mmc1.pdf [file mmc1.pdf]

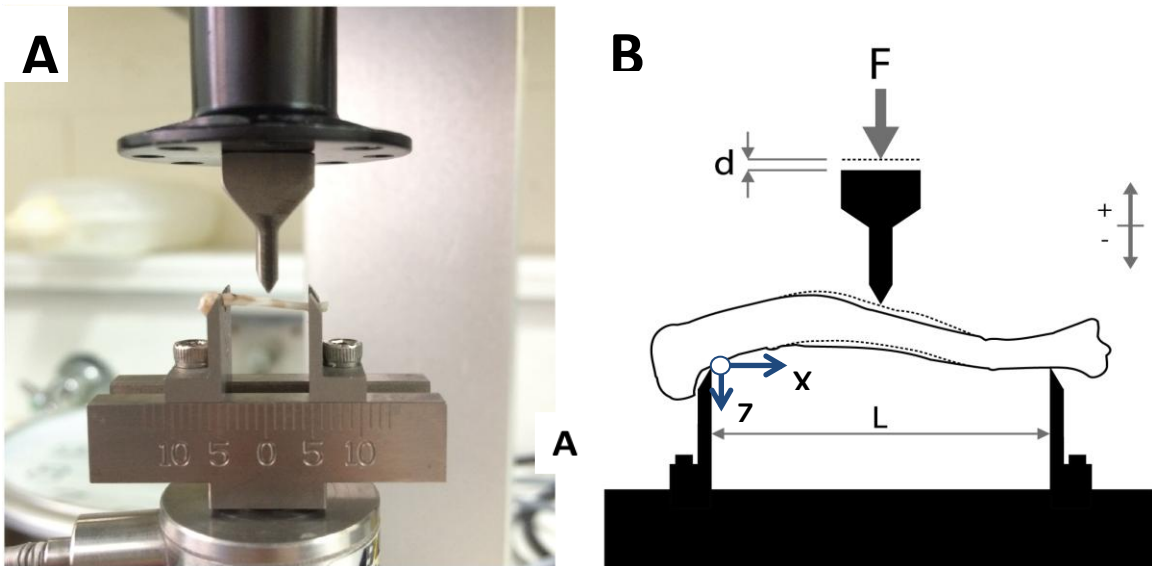

**Supplementary Figure 1.** (A) A photograph of the actual set up of the Bose Biodynamic 5500 Test Instrument. (B) A schematic representation of the 3-point bending apparatus where,  $F$  = applied load (in  $z$ -direction),  $L$  = distance (in  $x$ -direction) between supports,  $d$  = displacement/deformation of the bone (in  $z$ -direction).
